# Supplementary material for: The mitochondrial calcium uniporter is necessary for synaptic plasticity and proper mitochondrial morphology and distribution in the distal dendrites of CA2 neurons
Source: PubMed Central journal article supplement (PMC10659405; doi:10.1101/2023.11.10.566606), 2023-11-11

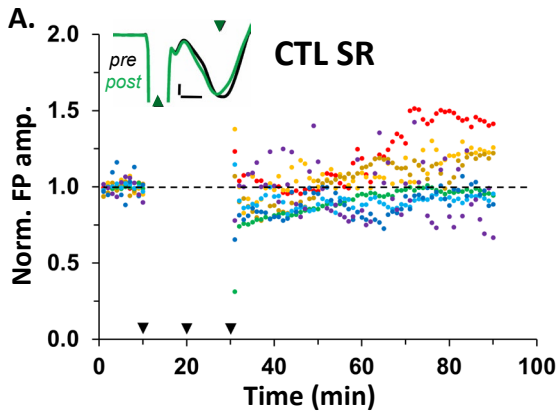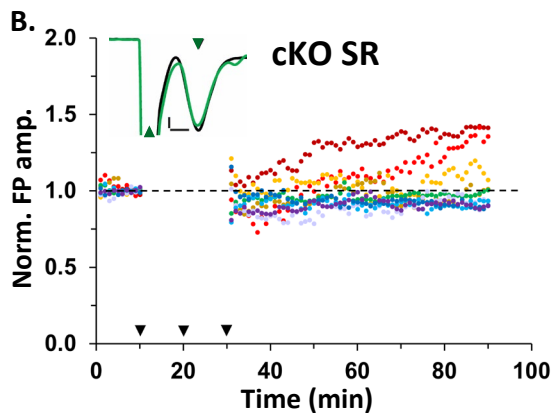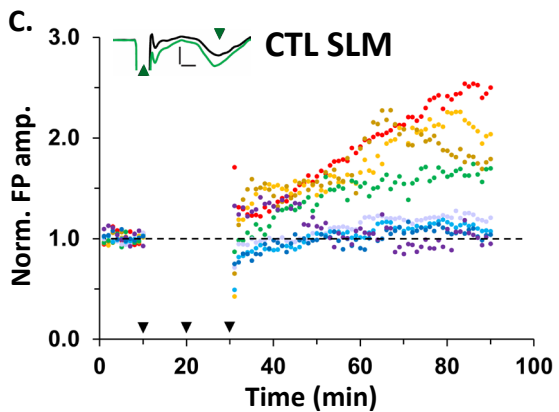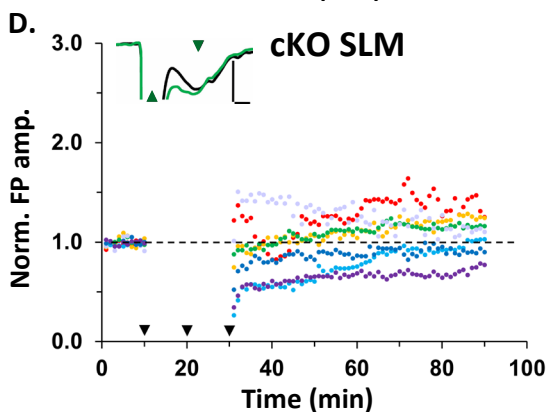

Supplement: media-1.pdf [file media-1.pdf]
